# Supplementary material for: Suppression of FoxO6 by lipopolysaccharide in aged rat liver
Source: PubMed Central journal article supplement (PMC4741442; doi:10.18632/oncotarget.6219), 2015-10-24
Supplement: oncotarget-06-34143-s001.pdf [file oncotarget-06-34143-s001.pdf]

## Suppression of FoxO6 by lipopolysaccharide in aged rat liver

### Supplementary Material

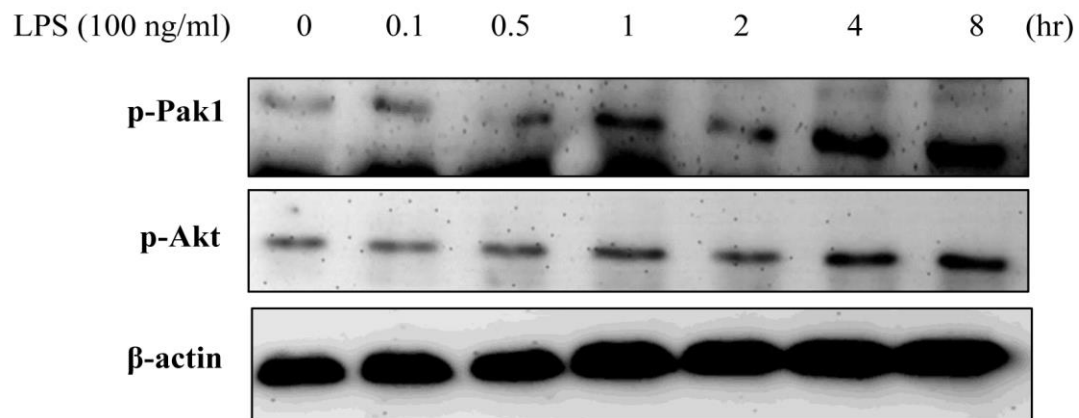

**Figure S1.** Enhancements of the phosphorylations of Pak1 and Akt in LPS-treated HepG2 cells. Pak1 and Akt activation levels were determined by Western blotting after treating HepG2 cells with 100 ng/ml LPS for various times. Samples loaded on sample gel were probed with  $\beta$ -actin. phosphorylated cytoplasmic Pak1 and Akt levels were noticeably diminished by LPS treatment at 0.1 to 8 hr.

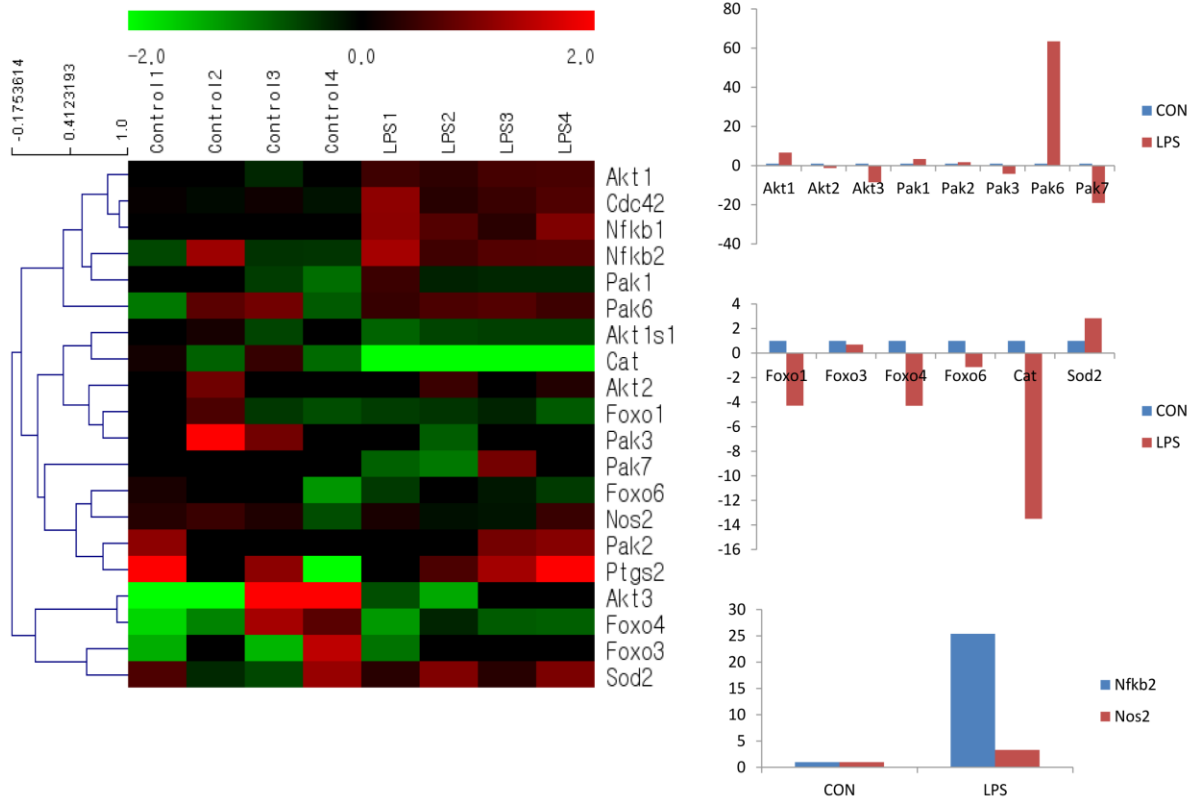

**Figure S2.** Microarray analysis of LPS treated mouse livers. This liver map shows the ten genes expressively altered by LPS treatment.

|                 |   |   |   |   |             |
|-----------------|---|---|---|---|-------------|
| FoxO6 (100 MOI) | - | - | + | + |             |
| LPS (100 ng/ml) | - | + | - | + | <b>Cold</b> |

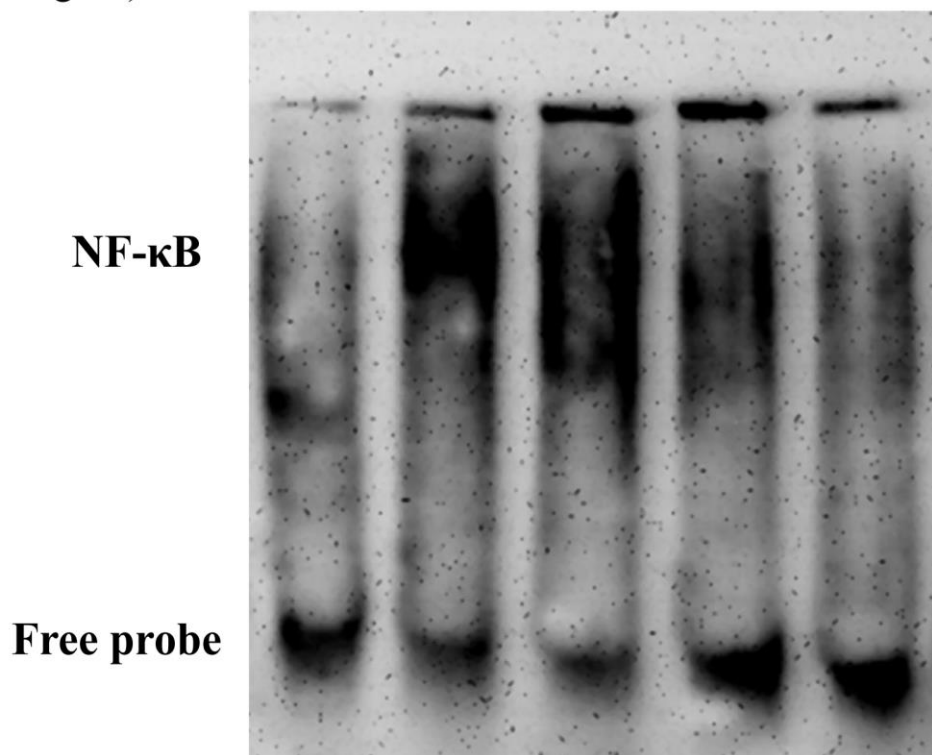

**Figure S3.** EMSA was used to compare nuclear NF-κB binding activities in HepG2 cells pre-incubated with FoxO6. Results are representative of three independent experiments.

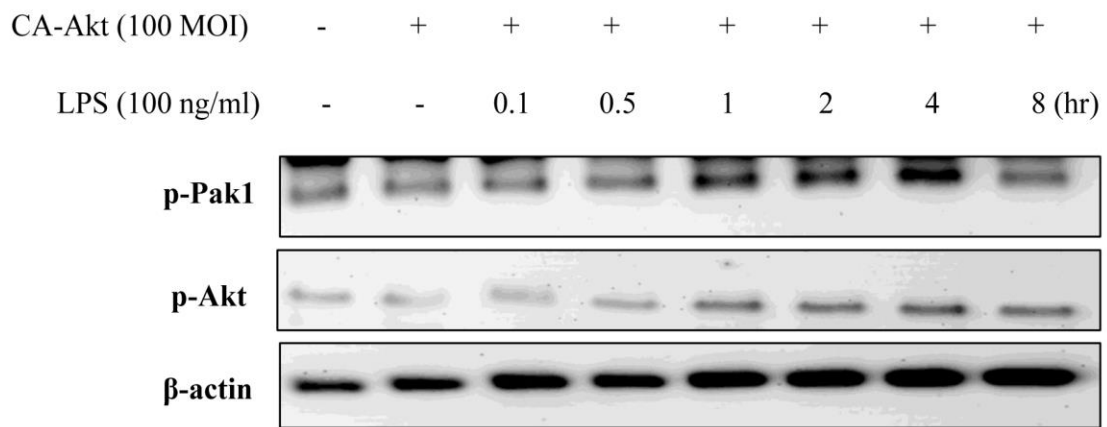

**Figure S4.** Increases in the phosphorylations of Pak1 and Akt in HepG2 cells exposed to oxidative stress. Cells were grown to 80% confluence in 100 mm dishes in DMEM medium, pre-treated (1 day) with CA-Akt (100 MOI), and then stimulated with 100 ng/ml LPS for 0.1 to 8h in the absence or presence of CA-Akt (100 MOI). Levels of phosphorylated Pak1 and Akt were determined in cell extracts.

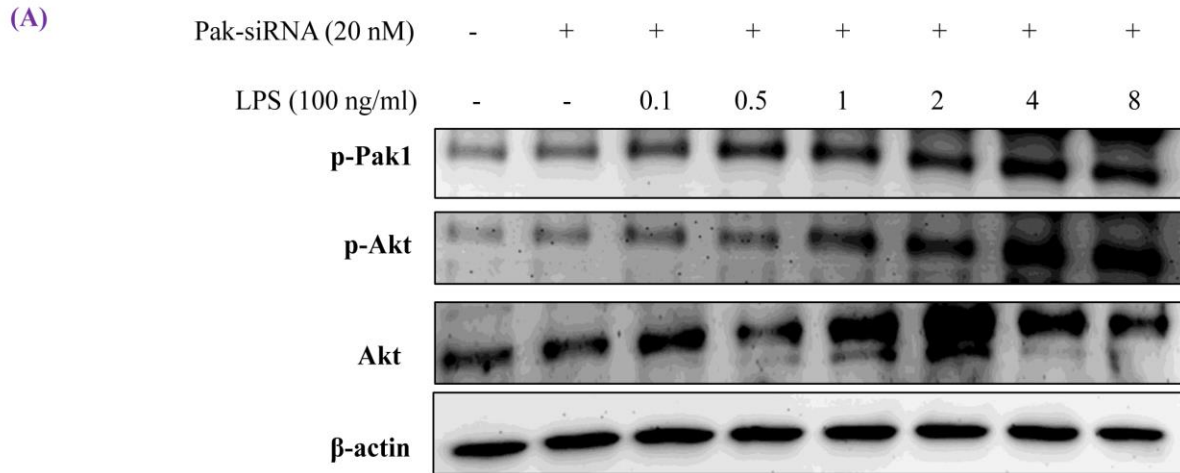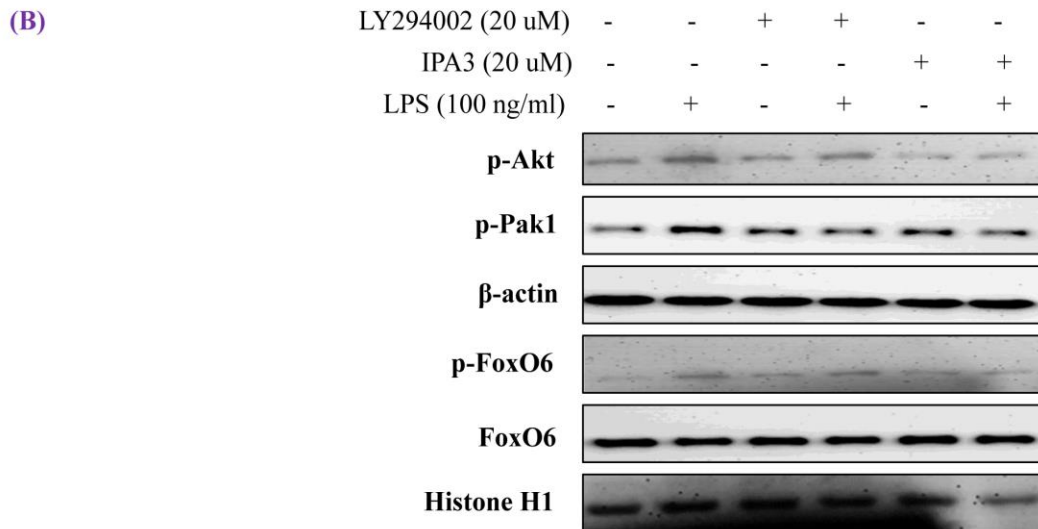

**Figure S5.** Regulation of FoxO6 by changes in the activities of Pak1 and Akt induced by LPS in HepG2 cells. (A) Cells were transfected (2 days) or not with Pak1-siRNA (20 nM) and then stimulated with 100 ng/ml LPS for 0.1 to 8 hr. Levels of phosphorylated Pak1 and Akt were assessed in cell extracts. (B) Cells pre-treated (1 hr) or not with IPA-3 or LY294002 (20  $\mu$ M; Pak1 and Akt inhibitors, respectively) and then stimulated with 100 ng/ml LPS for 2 hr. Levels of phosphorylated Pak1, Akt, phosphorylated FoxO6, and total FoxO6 were assessed in cell extracts.
